1 **Genomic landscapes of canine splenic angiosarcoma (hemangiosarcoma) contain extensive**  
2 **heterogeneity within and between patients**

3 Shukmei Wong<sup>1</sup>, EJ Ehrhart<sup>2</sup>, Samuel Stewart<sup>2</sup>, Victoria Zismann<sup>1</sup>, Jacob Cawley<sup>2,3</sup>, Rebecca  
4 Halperin<sup>1</sup>, Natalia Briones<sup>1</sup>, Keith Richter<sup>2</sup>, Karthigayini Sivaprakasam<sup>1</sup>, Nieves Perdigones<sup>1</sup>, Tania  
5 Contente-Cuomo<sup>1</sup>, Salvatore Facista<sup>1</sup>, Jeffrey M. Trent<sup>1</sup>, Muhammed Murtaza<sup>1</sup>, Chand Khanna<sup>2\*</sup>,  
6 William P. D. Hendricks<sup>1\*</sup>

7

8 <sup>1</sup>Translational Genomics Research Institute, Phoenix, Arizona, United States.

9 <sup>2</sup>Ethos Discovery, San Diego, CA, and Ethos Veterinary Health, Woburn, MA

10 <sup>3</sup>Department of Genetics and Genome Sciences, Case Western Reserve University, Cleveland,  
11 Ohio, USA

12

13 \*These authors contributed equally to this work

14

15 **Key Words:** Cancer, Canine, Hemangiosarcoma, Angiosarcoma, PIK3CA, TP53, Heterogeneity,  
16 Genomics

17

18 **ABSTRACT**

19 250 words

20 Cancer genomic heterogeneity presents significant challenges for understanding oncogenic  
21 processes and for cancer's clinical management. Variation in driver mutation frequency between  
22 patients with the same tumor type as well as within individual patients' cancers can limit the  
23 power of mutations to serve as diagnostic, prognostic, and predictive biomarkers. We have  
24 characterized genomic heterogeneity between and within patients in canine splenic  
25 hemangiosarcoma (HSA), a common naturally occurring cancer in pet dogs that is similar to  
26 human angiosarcoma (AS). HSA is a clinically, physiologically, and genomically complex canine  
27 cancer that may serve as a valuable model for understanding the origin and clinical impact of  
28 cancer heterogeneity. We conducted a prospective collection of 52 splenic masses from 44 dogs  
29 (28 HSA, 15 benign masses, and 1 stromal sarcoma) presenting to emergency care with  
30 hemoperitoneum secondary to a ruptured splenic mass. Multi-platform genomic analysis  
31 included matched tumor/normal cancer gene panel and exome sequencing. We found candidate  
32 somatic cancer driver mutations in 14/28 (50%) HSAs. Among recurrent candidate driver  
33 mutations, *TP53* was most commonly mutated (29%) followed by *PIK3CA* (14%), *AKT1* (11%), and  
34 *CDKN2AIP* (11%). We also identified significant intratumoral genomic heterogeneity, consistent  
35 with a branched evolution model, through multi-region exome sequencing of three distinct  
36 tumor regions from selected primary splenic tumors. These data provide new perspective on the  
37 genomic landscape and comparative value of understanding HSA in pet dogs, particularly as a  
38 naturally occurring cancer bearing intratumoral heterogeneity.

39

40 **MAIN TEXT (2,500 words, 4 tables or figures, 20 refs)**

41 **Introduction**

42 Angiosarcoma (AS), an aggressive cancer arising from vascular endothelium in anatomic sites  
43 including skin and viscera, is rare in humans, but far more common in pet dogs. Tens of thousands  
44 of canine diagnoses occur annually, comprising 45-51% of splenic cancers<sup>1</sup>. AS in dogs, also  
45 known as hemangiosarcoma (HSA), is a complex disease that shares clinical, histopathologic and  
46 molecular characteristics with AS<sup>2-9</sup>. Shared molecular features include transcriptional subtypes  
47 (angiogenic, inflammatory, and adipogenic<sup>4,6,8</sup>), point mutations (*TP53*, *PIK3CA*, *PTEN*, *PIK3R1*<sup>8-</sup>  
48 <sup>10</sup>), copy number gains (*PDGFRA*, *VEGFA*, *KIT*, *KDR*), and copy number deletions (*CDKN2A/B*,  
49 *PTEN*)<sup>8,11,12</sup>, many of which hold potential as biomarkers to guide clinical management. As a  
50 naturally occurring cancer, HSA is a setting in which to perform cross-species comparative studies  
51 to improve understanding of AS development and clinical management. AS in humans and dogs  
52 is also heterogeneous in clinical presentation, clinical course, histopathology and cellular  
53 composition. Genomic study of HSA may thereby present a unique opportunity to dissect the role  
54 of ITH in an aggressive sarcoma in which genomic biomarkers are increasingly utilized for clinical  
55 management.

56 Dramatic variation in clinical, cellular, and genomic cancer features is common across patients  
57 with the same tumor type as well as within tumors in individual patients. Such heterogeneity  
58 presents challenges for uniform diagnosis, prognosis, and treatment of many cancers<sup>13</sup>. ITH  
59 arising from branched evolution is particularly problematic for molecular and genomic  
60 diagnostics because it can lead to spatial variation in the abundance of mutations that may serve  
61 as biomarkers. Thus, especially in tumors that also bear cellular heterogeneity (e.g. with  
62 abundant stromal or vascular components), two different biopsies or even two different sections  
63 from the same biopsy may bear a variable spectrum of detectable driver mutations<sup>14</sup>. For  
64 example, at least 3 distinct tumor regions are needed to detect 5 key driver mutations with a 90%  
65 level of certainty<sup>15</sup>. ITH has also been associated with more aggressive tumor biology and poorer  
66 patient outcomes<sup>16</sup>. Understanding of evolutionary processes, clinical impacts, and clinical  
67 interventions in the setting of ITH is needed, but few preclinical *in vivo* models are capable of  
68 modeling such heterogeneity and human cancer studies are costly and challenging. HSA may  
69 provide a unique setting in which to study the origins and effects of ITH and its relevance for  
70 genomic diagnostics. Here, we describe the results of multi-platform genomic analysis of 51  
71 splenic masses from 43 dogs (27 HSAs, 15 benign lesions, and 1 stromal sarcoma) including  
72 matched tumor/normal exome and cancer gene panel-based next generation sequencing. These  
73 data expand understanding of HSA's inter- and intra-tumoral genomic heterogeneity.

74 **Results and Discussion**

75 To deepen understanding of angiosarcoma's genomic underpinnings and inter- and intra-tumoral  
76 heterogeneity, we undertook a prospective multicenter study<sup>17</sup> in which genomic analysis was  
77 performed on untreated benign and malignant tissues from 43 pet dogs presenting to emergency  
78 hospitals with hemoperitoneum after splenic mass rupture. Samples and sequencing platforms  
79 are summarized in **Table 1** and **Table S1**. Of 43 cases, 27 (63%) were diagnosed with HSA, 15

80 (34%) were diagnosed with benign lesions (11 benign complex nodular hyperplasia, 2 complex  
 81 hyperplasia with hematoma, 1 hematoma, and 1 myelolipoma) and 1 dog was diagnosed with  
 82 stromal sarcoma. Tumors were collected from three geographically distinct splenic regions. Each  
 83 of 3 sections was sub-divided for histopathology or genomics. Tumor content estimated via  
 84 histopathology in 23/27 HSA patients ranged from 0 to > 95% (median 10%, **Table S1**). The range  
 85 of tumor cell content and the high frequency of tumor sub-sections without identifiable tumor  
 86 cells both underscore the degree of cellular heterogeneity in HSA and potential challenges  
 87 associated with genomic discovery and diagnostic studies in this tumor type.

**Table 1. Samples and Sequencing Platforms**

| Patient Diagnosis                  | Total Unique Patients | Total Unique Samples | Samples per Sequencing Platforms          |
|------------------------------------|-----------------------|----------------------|-------------------------------------------|
| Hemangiosarcoma                    | 27                    | 36*                  | 24 T/N CCAP, 3 T CCAP, 4 T/N exome        |
| Benign Complex Nodular Hyperplasia | 11                    | 11                   | 3 T/N CCAP                                |
| Complex Hyperplasia w/Hematoma     | 2                     | 2                    | 2 T/N CCAP                                |
| Hematoma                           | 1                     | 1                    | 1 T/N CCAP                                |
| Myelolipoma                        | 1                     | 1                    | 1 T/N CCAP                                |
| Stromal sarcoma                    | 1                     | 1                    | 1 T/N CCAP                                |
| <b>Total</b>                       | <b>43</b>             | <b>52</b>            | <b>33 T/N CCAP, 3 T CCAP, 4 T/N exome</b> |

\*Pt 3, 11, 16, 22: All 3 tumor sections exome sequenced. Pt 3: All 3 tumor sections panel sequenced. Canine patients with benign or malignant splenic mass (T) and matching normal (N) when available were sequenced on with either the Canine Cancer Amplicon Panel (CCAP) or whole exome sequenced (exome). All malignant samples were confirmed to be hemangiosarcoma except for one, a stromal sarcoma.

88 To identify somatic single nucleotide variants (SNVs), we utilized a custom canine cancer next  
 89 generation sequencing amplicon panel<sup>18</sup> with regions covering commonly mutated genes in AS  
 90 and HSA (**Table S2**)<sup>11,12,19</sup> including 330 exonic regions of canine orthologs of 67 commonly  
 91 mutated human cancer genes. The section with the highest tumor content out of the three  
 92 sections was sequenced. Matched normal and tumor tissue was sequenced to an average depth  
 93 of 1,836x and 1,797x, respectively (**Table S3**). We identified 184 putative somatic SNVs across  
 94 this cohort, of which 38 occurred at an allele frequency (AF)  $\geq$  10%. At least one somatic mutation  
 95 with an AF  $\geq$  10% was seen in 13/27 (48%) of the sequenced tumors (**Figure 1**). The median AF  
 96 for all 184 putative somatic SNVs was 0.05 (range 0.02 – 0.41). *TP53* was the most frequently  
 97 mutated gene, with 11 mutations occurring across 8 patients (29%). Of 11 *TP53* mutations, 8  
 98 were missense with most occurring in human-equivalent pathogenic hotspots in the DNA-binding  
 99 domain. Single cases of splice acceptor (c.530-2A>C), stop gain (R296\*), and frameshift (T243fs)  
 100 mutations were identified. *PIK3CA* mutations were identified in 4 patients (14%). *PIK3CA* H1047L  
 101 was the only recurrent point mutation, identified in 2 cases. The third and fourth cases bore  
 102 H1047R and G1049R mutations. Amino acid 1047 is the most frequently mutated *PIK3CA* hotspot  
 103 in human cancers, previously shown to be mutated in HSA (30-46% of cases)<sup>9,12,20</sup>. *AKT1* was  
 104 mutated in 3 cases (11%) with two potentially pathogenic missense mutations, G37D and R23W,  
 105 and one frameshift, L52fs, with unknown significance. Additional likely pathogenic mutations in

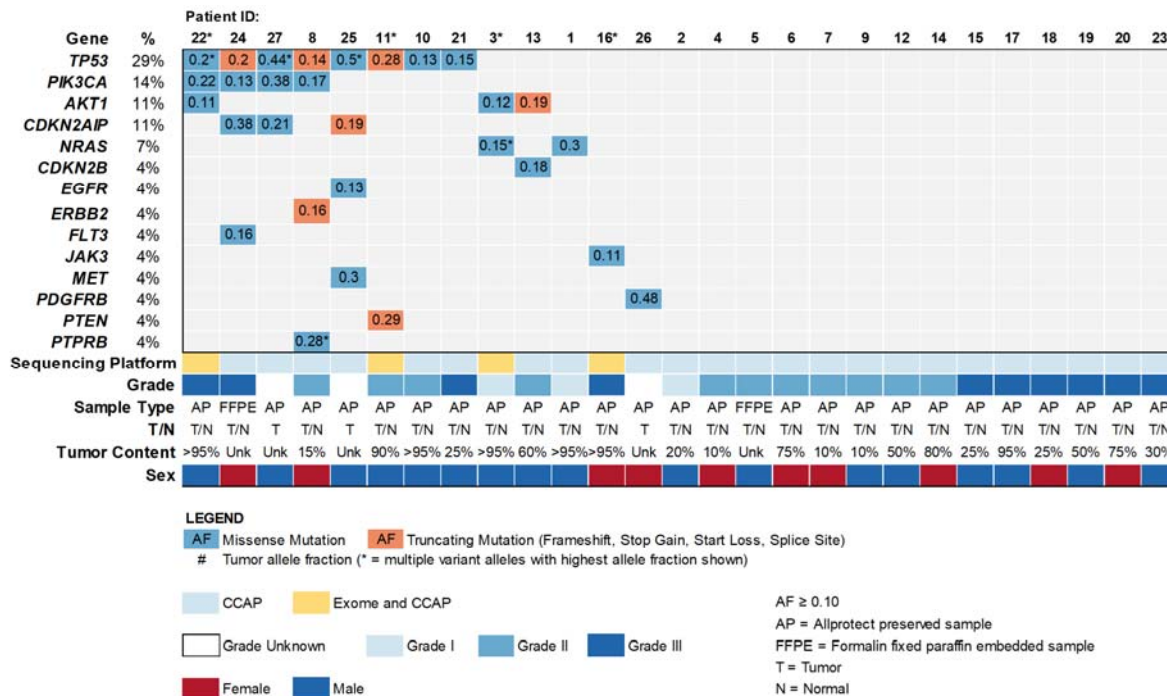

**Figure 1. The Landscape of Somatic SNVs in Splenic Hemangiosarcoma.** Recurrent, potentially pathogenic mutations were identified in 24 matched normal/tumor and 3 tumor-only FFPE- or AllProtect-preserved splenic hemangiosarcomas. As indicated by colored boxes, missense and truncating mutations identified by amplicon panel-based sequencing (CCAP) with allele frequencies  $\geq 0.1$  are shown. Allele frequencies are indicated in colored boxes. Tumor content percentage and tumor grade are shown where available. Patient IDs with asterisks indicate samples that were also exome-sequenced.

106 single patients included *CDKN2B* R105Q and *NRAS* Q61R. Variants of unknown significance (VUS)  
 107 include *CDKN2AIP* Q67R (a gene deleted in HSA via aCGH studies<sup>7</sup>), an *ERBB2* splice region  
 108 variant, *FLT3* N703S, *JAK3* M724T, *PTEN* H39fs, and *PTPRB* L1284P and S1965P. Of the 7 panel-  
 109 sequenced benign cases, only Patient 37 (benign hyperplasia) bore a somatic SNV in a cancer  
 110 gene - a VUS impacting *PTPRB*. Patient 43 (stromal sarcoma) bore a likely pathogenic missense  
 111 mutation at R789C in *GNAS*. These driver mutations and their frequencies resemble those  
 112 identified in HSA in other studies<sup>9,12,20</sup>. The genomic landscape of HSA confirmed here provides a  
 113 framework to guide study of HSA development while also guiding therapeutic strategies under a  
 114 precision medicine paradigm in which drug-biomarker relationships may exist in HSA (**Figure S1**).  
 115 Cross-study variation in this landscape, such as the lower rate of *PIK3CA* mutations identified in  
 116 our cohort relative to others, likely reflects natural variation by HSA anatomic site, clinical  
 117 characteristics, and breed in addition to variation in sequencing platforms and analysis  
 118 approaches. It underscores the need for expanded genomic study in very large cohorts. It also  
 119 remains possible that other drivers are present in this cohort in regions not included in the panel  
 120 in addition to copy number variation, translocations, and fusions. Finally, the low median AF of  
 121 SNVs, despite sequencing of high tumor content sections, supports existence of significant  
 122 subclonal heterogeneity.

123 In order to more deeply explore heterogeneity, we next directly measured ITH via whole exome  
 124 sequencing (WES) of three geographically distinct splenic sections from 4 patients (Patients 3, 11,  
 125 16, 22) along with their matching constitutional DNA from peripheral blood, achieving average  
 126 sequencing coverage of 214x for tumors and 211x for normals. Patients with pathogenic  
 127 mutations according to panel-based sequencing and those with high tumor content according to  
 128 pathology for all 3 sections were selected (**Table S1**). These tumors bore a low tumor mutation  
 129 burden (TMB), median = 0.7 mutations/Mb (range: 0.3-2.9 mutations/Mb, **Table 2**). Tumor  
 130 content estimates, determined by Sequenza using AFs from exome sequencing data, suggested  
 131 a median of 21% (range 10-57%, **Table 2**) whereas pathology estimates suggested a median of  
 132 75% (range 25%->95%, **Table S1**). This discordance is likely influenced by low TMB in these cases.

**Table 2. Tumor Mutation Burden and Tumor Content of Exome-Sequenced Samples**

| Sample | Tumor Section | TMB (Mutations/Mb) | Tumor Content (%) |
|--------|---------------|--------------------|-------------------|
| Pt 3   | 1             | 0.315              | 10%               |
| Pt 3   | 2             | 0.265              | 10%               |
| Pt 3   | 3             | 1.106              | 10%               |
| Pt 11  | 1             | 2.855              | 30%               |
| Pt 11  | 2             | 2.582              | 52%               |
| Pt 11  | 3             | 2.620              | 43%               |
| Pt 16  | 1             | 0.047              | 10%               |
| Pt 16  | 2             | 0.682              | 57%               |
| Pt 16  | 3             | 0.702              | 40%               |
| Pt 22  | 1             | 0.246              | 12%               |
| Pt 22  | 2             | 1.028              | 40%               |
| Pt 22  | 3             | 0.033              | 10%               |

Tumor mutation burden (TMB) and tumor content of corresponding tumor sections of exome sequenced HSA patients are shown.

Analysis of intersecting somatic mutations across 3 tumor regions from 4 patients by WES identified substantial intratumoral genomic heterogeneity (**Table S6**). Between 0 and 64% of SNVs were detected in at least 2 regions and 0-13% were detected in all 3 regions. In Patient 3, 9/62 (15%) SNVs were shared in 2 or more regions and 3 (5%) were shared in all regions. *NRAS* Q61R was detected in all regions. In Patient 11, 61/181 (34%) SNVs occurred in 2 or more regions and 24 (13%) were shared among all regions. Two driver mutations, *TP53* T243fs and *PIK3CA* G1007R, were present in all regions. In Patient

151

152 16, 18/28 (64%) SNVs were shared in regions 2 and 3, including the pathogenic *TP53* Y152S. No  
 153 mutations were shared by all regions or between regions 1 and 3. For Patient 22, no mutations  
 154 were shared among all regions. Only region 2 bore candidate driver missense mutations (also  
 155 identified by CCAP): *TP53* G256E and R272H and *PIK3CA* H1047L. In most cases where a tumor  
 156 section was sequenced by both CCAP and WES, mutation concordance between CCAP-targeted  
 157 and WES-targeted genomic regions was seen with the exception of *PIK3CA* G1007R in Patient 11  
 158 (detected by WES, but not CCAP likely due to its occurrence in a CCAP primer region) and *AKT1*  
 159 G37D in Patient 22 (detected in CCAP but not WES likely due to the increased sensitivity of CCAP  
 160 sequencing). This assessment of shared or private mutations across different geographic regions  
 161 from the same tumor supports that significant genomic heterogeneity exists in HSA.

162 To quantify the degree and makeup of ITH, we next inferred the composition of clonal groups  
 163 across tumor regions using LumosVar<sup>21</sup>, a tool that utilizes copy number states and point  
 164 mutation allele frequencies to define clonal groups in multiple biopsies from the same patient.  
 165 Each grouping is specific to the individual patient, though groups are shared among tumors from

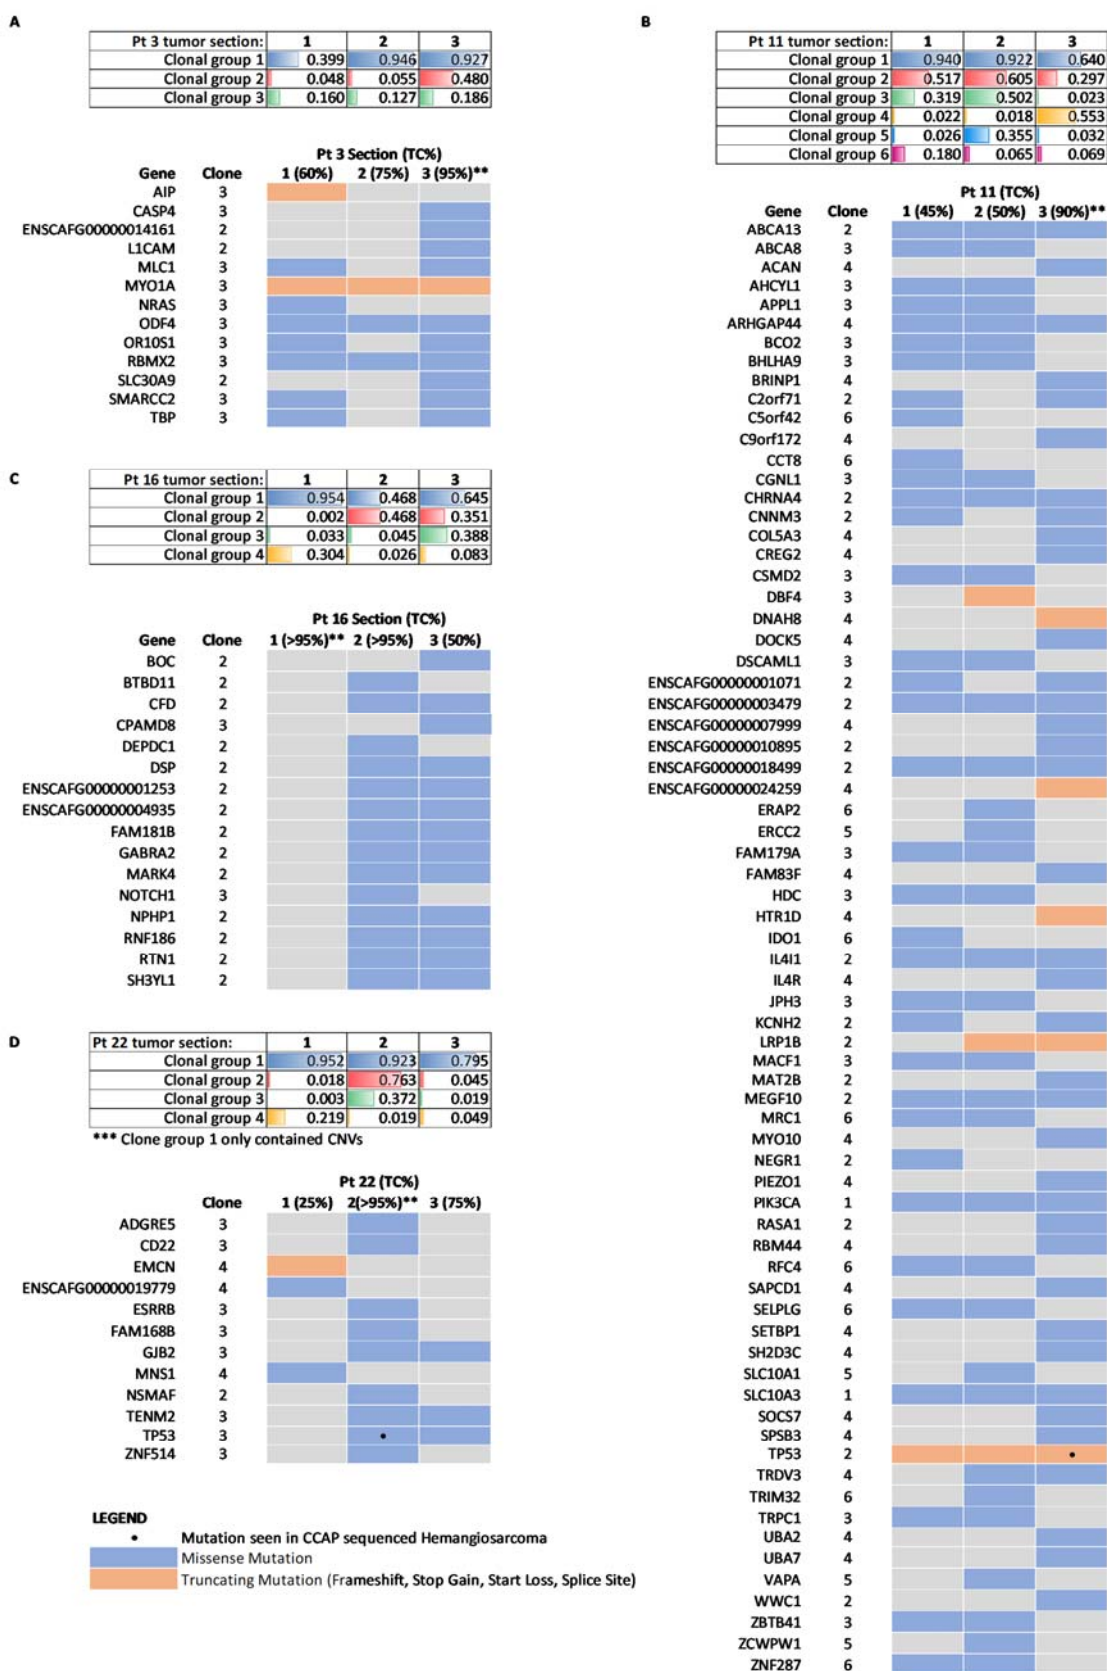

**Figure 2. Intratumoral Genomic Heterogeneity in Splenic Hemangiosarcoma.** Intratumoral heterogeneity was assessed via whole exome sequencing of 3 distinct geographic regions from 4 canine HSA patients. The composition of clonal groups across tumor regions was inferred via LumosVar2<sup>21</sup> using CNVs and SNV allele frequencies. Tables show percentage of cells within each separate region for each patient within specified clonal groups. Individual patient oncprints show only coding and nonsynonymous mutations in genes associated with each clonal group. Patients 3 (A), 11 (B) and 22 (D) have at least one missense or truncating mutation shared among all three tumor sections. Patient 16's (C) tumor section one did not contain any SNVs that are seen in sections 2 and 3. \*Total # of filtered somatic SNVs (includes all somatic SNVs: synonymous, missense, etc.). \*\*Indicates tumor section also sequenced by amplicon panel.

167 the same patient. Patient 11's tumor bore the highest TMB and also displayed the greatest  
168 degree of heterogeneity (6 clonal groups) whereas the other 3 tumors bore 3-4 groups (**Figure**  
169 **2**). Each tumor contained one unique, dominant group, Group 1, present at high frequency in all  
170 regions (40-95%). Thus, at least 40% of the cells across all tumor regions in each patient contained  
171 variants from this dominant group (**Figure 2A-D**). Those variants include all somatic mutations  
172 (including synonymous, intronic, missense, and truncating mutations). Based on their frequency,  
173 these dominant groups may be truncal or early evolutionary events in each tumor's  
174 development. Notably, established oncogenic driver mutations such as *NRAS* Q61R (Patient 3)  
175 and *TP53* mutations (Patients 11 and 22) were typically not part of the dominant Group 1. The  
176 only Group 1 driver was *PIK3CA* G1007R in Patient 11, present in all 3 sections. In fact, no coding  
177 SNVs were present in Group 1 in Patients 3, 16, or 22 while Patient 11 contained only *PIK3CA* and  
178 *SLC10A3* (likely a passenger) variants in Group 1. Our analysis of intersecting somatic mutations  
179 from distinct regions of primary splenic HSA thus supports the presence of significant ITH  
180 consistent with a model of branched evolution in which key driver mutations may serve as early  
181 events in tumorigenesis, but these events are variable between patients. Alongside cellular  
182 heterogeneity (i.e. tumor content variability), this genomic heterogeneity holds implications for  
183 HSA development. It also presents technical challenges in mutation detection for clinical  
184 applications. Importantly, our studies focused on cases containing known drivers and modest  
185 mutation burden. Other cases with low TMB and/or lacking established drivers may well reveal  
186 different evolutionary trajectories.

187 ITH reflects the evolutionary trajectory of solid tumors. It may be associated with aggressive  
188 tumor biology and it presents significant challenges for genomic research and diagnostics. We  
189 have established that canine HSA contains substantial ITH. Our multi-platform genomic analysis  
190 of 52 splenic tumor samples confirms the presence of key driver mutations in HSA while also  
191 revealing extensive ITH. These data have bearing on biologic understanding and clinical  
192 management of HSA in pet dogs including shaping the development of new diagnostic tools and  
193 biomarker-driven treatment studies. These studies can also further inform the intersections in  
194 canine and human angiosarcoma genomics and present a common cancer type for studying ITH.  
195 We can now begin to leverage our understanding of the presence of this genomic heterogeneity  
196 in these naturally occurring cancer models to develop and adapt strategies to translate the value  
197 of genomic medicine to human and canine cancer patients.

198 **Materials and Methods**

## 199 **Sample collection and nucleic acid extraction**

200 Three splenic masses preserved in AllProtect reagent (Qiagen) and formalin from previously  
201 diagnosed HSA were used as pilot samples for evaluation of an in-house developed canine  
202 amplicon panel. For clinical samples from the 10 Ethos Discovery affiliated animal hospitals, with  
203 owner consent, whole blood and splenic masses were collected via splenectomy from 43 canine  
204 patients who were diagnosed with a hemoperitoneum with a ruptured splenic mass and had not  
205 received previous chemotherapeutic treatment for hemangiosarcoma. Tumor sample collection  
206 was performed within 5 minutes of the spleen being removed from patient. Multiple 1 x 1 x 1 cm  
207 biopsies were taken from three geographically distinct regions of the spleen (primary tumor,  
208 tumor periphery, and normal spleen). The primary tumor section was further divided into  
209 additional sections where each subsequent section was placed in the following: 10% formalin for  
210 histopathology, AllProtect reagent for nucleic acid extraction, cryovials containing fetal bovine  
211 serum and 10% DMSO for cryogenic cell storage, and L15 tissue collection media for future cell  
212 line development. The samples in formalin, AllProtect reagent, and L15 media were refrigerated  
213 at 4°C and cryovials were frozen at -20°C until submission.

214 2 x 10 ml of whole blood was collected into two Cell Free DNA BCT Streck tubes (Streck, Inc.) from  
215 each dog at presentation and every 60 days. Streck tubes were process as per manufacturer  
216 protocol. Buffy coat and plasma were collected and stored in -20°C until nucleic acid isolation  
217 whereas cell free DNA is stored for further investigation. Genomic DNA from 200uL buffy coat  
218 was isolated with DNeasy Blood and Tissue kit (Qiagen) according to manufacturer's protocol.  
219 Tumor nucleic acid extractions were performed using the Allprep DNA/RNA/miRNA Universal kit  
220 (Qiagen) according to manufacturer's protocol. Briefly, tumor tissue in Allprotect was first rinsed  
221 with sterile 1X phosphate buffered saline and minced with sterile scalpel. 30 mg of the minced  
222 tissue was then homogenized using the Bullet Blender Bead lysis kit (NextAdvance) and the  
223 resulting supernatant was further homogenized with QiaShredder (Qiagen). The flow through  
224 was used for nucleic acid extraction. Quality and quantity of blood and tumor genomic DNA was  
225 performed using the Qubit Fluorometer 2.0 (ThermoFisher Scientific) and TapeStation genomic  
226 DNA assay (Agilent Technologies). Genomic DNA was stored in -20°C until sequencing library  
227 construction. RNA was extracted and stored in -80°C for future use as per manufacturer's  
228 instructions.

## 229 **Exome Sequencing and Analysis**

230 Genomic DNA from blood and all 3 tumor sections from 4 HSA patients (patients 03, 11, 16, 22)  
231 underwent whole exome sequencing using a custom Agilent SureSelect canine exome capture kit  
232 with 982,789 probes covering 19,459 genes. Exome libraries were sequenced on the Illumina  
233 NovaSeq 6000 producing paired end reads of 100bp. Analysis tools and their parameters are  
234 shown in **Table S4**. FASTQ files were aligned to the canine genome (CanFam3.1.75) using BWA  
235 v0.7.8. Aligned BAM files were realigned and recalibrated using GATK v3.3.0 and duplicate pairs  
236 were marked with Picard v1.128 (<http://broadinstitute.github.io/picard>). Somatic single  
237 nucleotide variants (SNV) were identified only when called by two or more of the following  
238 callers: Seurat v2.6, Strelka v1.0.13 and MuTect v1.1.4. Germline SNVs were called using  
239 Haplotype Caller (GATK v3.3.0), Freebayes and samtools-Mpileup. Variant annotation was  
240 performed with SnpEff v4.3. TMB was calculated as the total number of somatic mutations per



241 haploid callable Megabase (Mb) from WES<sup>22</sup>. Percent tumor content was inferred from somatic  
242 mutation data utilizing Sequenza.<sup>23</sup> LumosVar<sup>21</sup> was utilized for clonal variant group analysis.  
243 Clonal groups may contain both CNVs and SNVs. Only SNVs designated as “PASS  
244 SomaticDetected” were utilized for clonal analysis. The exome data corresponding to normal  
245 blood and tumor sections are uploaded to Sequencing Read Archive under BioProject  
246 PRJNA677995.

#### 247 **Targeted Amplicon Sequencing and Analysis**

248 Targeted amplicon sequencing was performed on genomic DNA from matched blood and DNA  
249 from individual patient tumor section with the highest tumor content. A custom canine HSA  
250 cancer amplicon sequencing panel consisting of 330 amplicons targeting exons and hotspot  
251 regions in 68 genes, with amplicon sizes ranging from 91-272 bp was developed (**Table S2**).  
252 Primers were pooled in two multiplexed pools to separate adjacent amplicons and any amplicons  
253 with high potential for cross-amplification using *in silico* PCR. Sequencing libraries were  
254 constructed using droplet-based PCR amplification following the manufacturer’s protocols for  
255 the ThunderBolts Cancer Panel with specific modifications (RainDance Technologies) as  
256 previously described<sup>24</sup>. Paired-end sequencing was performed on an Illumina MiSeq generating  
257 275bp reads. Analysis tools and parameters are shown in **Table S4**. Sequencing reads were  
258 demultiplexed and extracted using Picard 2.10.3. Sequencing adapters were trimmed using  
259 ExpressionAnalysis ea-utils and quality of fastq files were assessed with FastQC v0.11.5.  
260 Sequencing reads were aligned to CanFam3.1.75 using bwamem-MEM. Custom in-house scripts  
261 based on SAMtools were used to create pileups for every sample. Pileups were analyzed in R to  
262 call SNVs and indels. For each potential non-reference allele at each targeted locus in a sample,  
263 we evaluated the distribution of background noise across all other sequenced samples. To call a  
264 variant, we required the observed non-reference allele is an outlier from the background  
265 distribution with a Z-score > 5. In addition, we required tumor depth ≥100x, allele frequency  
266 ≥10%, number of reads supporting the variation ≥10, and allele fraction in the germline sample  
267 <1%. Finally, variant calls were manually curated by visualization in IGV v2.4.9. All sequencing  
268 data have been deposited in the Sequencing Read Archive under BioProject PRJNA677995.

269

#### 270 **ACKNOWLEDGEMENTS**

271 We thank the families of the pets who contributed samples for this study. This study was funded  
272 by Ethos Discovery and philanthropic contributions to the TGen Foundation.

273

#### 274 **AUTHOR CONTRIBUTIONS**

275 Conception and design: C. Khanna, W.P.D. Hendricks, S. Stewart, E.J. Ehrhart

276 Development of methodology: M. Murtaza, W. Hendricks, E.J. Ehrhart

277 Acquisition of data (acquired and managed patients, provided tissues, processed tissues,  
278 performed sequencing, etc.): S. Stewart, S. Wong, T. Contente-Cuomo

279 Analysis and interpretation of data (e.g., statistical analysis, biostatistics, computational analysis):  
280 S. Wong, R. Halperin, N. Briones, K. Sivaprakasam, N. Perdignes, S. Facista

281 Writing, review, and/or revision of the manuscript: S. Wong, C. Khanna, J. Cawley, W.P.D.  
282 Hendricks

283 Administrative, technical, or material support (i.e., reporting or organizing data, constructing  
284 databases): V. Zismann, Y. Pan, Y. He, K. Richter, J. Trent

285 Study supervision: C. Khanna, W.P.D. Hendricks

286

## 287 **COMPETING INTERESTS**

288 WPDH is the Founder and Chief Scientific Officer of Vidium Animal Health.

## 289 **FIGURES**

290 **Figure S1. The Naturally Occurring Heterogeneity of Canine Hemangiosarcoma Provides a**  
291 **Unique Opportunity to Test Hypotheses Addressing Challenges in the Delivery of Cancer**  
292 **Precision Medicine across Species.** Intratumoral genomic heterogeneity presents challenges to  
293 cancer precision medicine (i.e. the utilization of genomic diagnostics to guide the clinical  
294 management of cancer patients). For example, variability in subclonal frequency of driver  
295 mutations may modulate treatment response. Additionally, such variability means that any given  
296 biopsy utilized for genomic analysis may not contain driver mutations with predictive associations  
297 even if these mutations are highly abundant in major lineages in the tumor. This study has  
298 confirmed the presence of genomic variants and intratumoral heterogeneity in canine HSA that  
299 can facilitate hypothesis testing and methods development to meet these needs. For example,  
300 NRAS and PIK3CA mutations such as those described in HSA have been associated with MEK and  
301 PIK3CA inhibitor responses, respectively, in human cancers and may also be associated with such  
302 responses in canine cancers. Such responses, however, may also be dependent on intratumoral  
303 heterogeneity and will certainly be dependent on the ability to detect subclonal or low allele-  
304 frequency mutations. Basket and umbrella clinical trials that test such hypotheses in canine HSA  
305 will hold value broadly for understanding heterogeneous human cancers and will be especially  
306 valuable in less common human cancers such as angiosarcoma.

307

## 308 **SUPPLEMENTAL TABLES**

309 **Table S1. Extended Demographic and Clinical Annotation**

310 **Table S2. Genes Included in Custom Cancer Amplicon Panel**

311 **Table S3. Targeted Panel and Exome Sequencing Statistics**

312 **Table S4. Informatic Tools, Versions, and Parameters Utilized in Primary Analysis of Canine**  
313 **Hemangiosarcoma Whole Exome Data**

314 **Table S5. Somatic SNVs Identified by Panel Sequencing in Canine Splenic Lesions**

315 **Table S6. Somatic SNVs Identified by Exome Sequencing in HSA**

316 **Table S7. Intratumoral Clonal Variant Groups Determined by Analysis of Somatic Variants**  
317 **Identified by Whole Exome Sequencing.**

318 **Table S8. Somatic CNVs Identified by Exome Sequencing in Canine Hemangiosarcoma**

319

## 320 REFERENCES

- 321 1. Vail, D.M., Thamm, D. & Liptak, J. *Withrow and MacEwen's Small Animal Clinical*  
322 *Oncology-E-Book*, (Elsevier Health Sciences, 2019).
- 323 2. Vail, D.M. & MacEwen, E.G. Spontaneously occurring tumors of companion animals as  
324 models for human cancer. *Cancer Invest* **18**, 781-92 (2000).
- 325 3. Dickerson, E. *et al.* Mutations of phosphatase and tensin homolog deleted from  
326 chromosome 10 in canine hemangiosarcoma. *Veterinary pathology* **42**, 618-632 (2005).
- 327 4. Tamburini, B.A. *et al.* Gene expression profiling identifies inflammation and angiogenesis  
328 as distinguishing features of canine hemangiosarcoma. *BMC cancer* **10**, 619 (2010).
- 329 5. Behjati, S. *et al.* Recurrent PTPRB and PLCG1 mutations in angiosarcoma. *Nature*  
330 *genetics* **46**, 376-379 (2014).
- 331 6. Gorden, B.H. *et al.* Identification of three molecular and functional subtypes in canine  
332 hemangiosarcoma through gene expression profiling and progenitor cell  
333 characterization. *Am J Pathol* **184**, 985-995 (2014).
- 334 7. Thomas, R. *et al.* Genomic profiling reveals extensive heterogeneity in somatic DNA copy  
335 number aberrations of canine hemangiosarcoma. *Chromosome research* **22**, 305-319  
336 (2014).
- 337 8. Megquier, K. *et al.* Comparative genomics reveals shared mutational landscape in canine  
338 hemangiosarcoma and human angiosarcoma. *Molecular Cancer Research* **17**, 2410-2421  
339 (2019).
- 340 9. Wang, G. *et al.* Molecular subtypes in canine hemangiosarcoma reveal similarities with  
341 human angiosarcoma. *PloS one* **15**, e0229728 (2020).
- 342 10. Wang, G. *et al.* Actionable mutations in canine hemangiosarcoma. *PloS one* **12**(2017).
- 343 11. Thomas, R. *et al.* Genomic profiling reveals extensive heterogeneity in somatic DNA copy  
344 number aberrations of canine hemangiosarcoma. *Chromosome Res* **22**, 305-19 (2014).

- 345 12. Wang, G. *et al.* Actionable mutations in canine hemangiosarcoma. *PLoS One* **12**,  
346 e0188667 (2017).
- 347 13. Melo, F.D.S.E., Vermeulen, L., Fessler, E. & Medema, J.P. Cancer heterogeneity—a  
348 multifaceted view. *EMBO reports* **14**, 686-695 (2013).
- 349 14. Dagogo-Jack, I. & Shaw, A.T. Tumour heterogeneity and resistance to cancer therapies.  
350 *Nature reviews Clinical oncology* **15**, 81 (2018).
- 351 15. Sankin, A. *et al.* The impact of genetic heterogeneity on biomarker development in  
352 kidney cancer assessed by multiregional sampling. *Cancer medicine* **3**, 1485-1492 (2014).
- 353 16. Morris, L.G. *et al.* Pan-cancer analysis of intratumor heterogeneity as a prognostic  
354 determinant of survival. *Oncotarget* **7**, 10051 (2016).
- 355 17. Stewart, S.D., Ehrhart, E., Davies, R. & Khanna, C. Prospective observational study of  
356 dogs with splenic mass rupture suggests potentially lower risk of malignancy and more  
357 favorable perioperative outcomes. *Veterinary and Comparative Oncology* (2020).
- 358 18. Lorch, G. *et al.* Identification of frequent activating HER2 mutations in primary canine  
359 pulmonary adenocarcinoma. *bioRxiv*, 528182 (2019).
- 360 19. Behjati, S. *et al.* Recurrent PTPRB and PLCG1 mutations in angiosarcoma. *Nat Genet* **46**,  
361 376-379 (2014).
- 362 20. Lindblad-Toh, K. Genomic analysis reveals shared genes and pathways in human and  
363 canine angiosarcoma. *bioRxiv* (2019).
- 364 21. Halperin, R.F. *et al.* Leveraging spatial variation in tumor purity for improved somatic  
365 variant calling of archival tumor only samples. *Frontiers in oncology* **9**, 119 (2019).
- 366 22. Xu, Z. *et al.* Assessment of tumor mutation burden calculation from gene panel  
367 sequencing data. *Onco Targets Ther* **12**, 3401-3409 (2019).
- 368 23. Favero, F. *et al.* Sequenza: allele-specific copy number and mutation profiles from tumor  
369 sequencing data. *Ann Oncol* **26**, 64-70 (2015).
- 370 24. Murtaza M, D.S., Pogrebniak K, Rueda OM, Provenzano E, Grant J, Chin SF, Tsui DW,  
371 Marass F, Gale D, Ali HR, Shah P, Contente-Cuomo T, Farahani H, Shumansky K,  
372 Kingsbury Z, Humphray S, Bentley D, Shah SP, Wallis M, Rosenfeld N, Caldas C.

373 Multifocal clonal evolution characterized using circulating tumour DNA in a case of  
374 metastatic breast cancer. *Nat Commun* **4**, 8760 (2015).

375
